# Supplementary material for: Transcriptomic and Mutational Analysis Discovering Distinct Molecular Characteristics Among Chinese Thymic Epithelial Tumor Patients
Source: Front Oncol. 2021 Sep 8;11:647512. doi: 10.3389/fonc.2021.647512 (PMC8456088; doi:10.3389/fonc.2021.647512)
Supplement: Supplementary file 2 [file Table_1.xlsx]

## Sheet: Sheet1
Table S1. Clinical and diagnostic information for the 27 TET patients.
Patient ID	Histological Class	Masaoka Stage	TNM Stage	Autoimmune disease	Immunohistochemistry
					PAX-8	EMA	P63	TdT	Vinentin	AE1/AE3	CD3	CD5	CD20	CD68	CD99	CK19	Desmin	Other
P1	A	I	T1N0M0, I	Gout	Neg	Focal+	Pos	Neg	Interstitial+	Pos	Neg	Focal+	Neg	Neg	Partial+	Pos	Neg
P2	A	II	T2N0M0, II	None	Neg	NA	NA	Neg	NA	Pos	Neg	NA	Neg	NA	NA	Pos	Neg	Ki-67 (index5%), CD34 (-)
P3	AB	I	T1N0M0, I	None	NA
P4	AB	I	T1N0M0, I	None	Neg	Partial+	Pos	Pos	Pos	Pos	Pos	Pos	Partial+	NA	Partial+	Pos	Neg
P5	AB	III	T3N0M0, IIIA	None	Neg	Neg	Scattered+	Pos	Pos	Pos	Pos	Pos	Focal+	Scattered+	Pos	Pos	Neg
P6	AB	II	T2N0M0, II	Myasthenia Gravis	Neg	Neg	Focal+	Focal+	Focal+	Pos	Focal+	Focal+	Neg	Neg	Neg	Pos	Neg
P7	AB	I	T1N0M0, I	None	Neg	Neg	Pos	Pos	Pos	Pos	Pos	Pos	Focal+	Scattered+	Pos	Pos	Neg
P8	AB	I	T1N0M0, I	None	Neg	Neg	Epithelial+	Lymphocyte+	Pos	Epithelial+	Tlymphocyte+	Pos	Pos	Histocyte+	Pos	Epithelial+	Neg
P9	B1	I	T1N0M0, I	Myasthenia Gravis	Pos	Neg	Pos	Pos	Pos	Pos	Pos	Pos	Focal+	Pos	Pos	Pos	Neg
P10	B1	I	T1N0M0, I	None	NA	Neg	NA	Pos	NA	Pos	Pos	Pos	Scattered+	NA	Pos	Pos	NA	CD117 (-), CD1a (+), Ki-67 (index80%)
P11	B1	III	T3N0M0, IIIA	Ocular Myasthenia Gravis	Neg	Neg	Pos	Pos	Pos	Pos	Pos	Pos	Scattered+	Scattered+	Pos	Pos	Neg
P12	B1	III	T3N0M0, IIIA	Myasthenia Gravis	Neg	NA	Partial+	Neg	NA	NA	NA	Pos	NA	NA	NA	Pos	NA	CgA (-), Syn (-), Ki-67 (index5%), CD117 (-), TTF-1 (-)
P13	B2	III	T3N0M0, IIIA	None	NA	Neg	Pos	Pos	NA	Pos	Pos	Pos	Focal+	NA	Pos	Pos	NA	CD117 (-), CD1a (+), Ki-67 (index50%)
P14	B2	I	T1N0M0, I	None	Neg	Neg	Pos	Pos	Pos	Pos	Pos	Neg	Pos	Pos	Pos	Pos	Neg
P15	B2	I	T1N0M0, I	Myasthenia Gravis	Pos	Neg	Pos	Pos	Pos	Pos	Pos	Pos	Neg	Scattered+	Pos	Pos	Neg	CD1a (+), Ki-67 (index60%)
P16	B2	I	T1N0M0, I	None	NA	NA	NA	Pos	NA	Pos	Pos	Pos	Neg	NA	NA	Pos	NA
P17	B2	III	T3N0M0, IIIA	None	Pos	Neg	Pos	Pos	Pos	Pos	Pos	Pos	Scattered+	Scattered+	Pos	Pos	Neg
P18	B2	II	T2N0M0, II	Myasthenia Gravis	Neg	Focal+	Pos	Pos	Pos	Pos	Pos	Pos	Focal+	Scattered+	Pos	Pos	Neg	CD1a (+), Ki-67 (index90%)
P19	B2	II	T2N0M0, II	Myasthenia Gravis	Neg	Partial+	Pos	Lymphocyte+	Partial+	Pos	Lymphocyte+	Pos	Neg	Neg	Lymphocyte+	Pos	Neg	CD117 (-)
P20	B3	III	T3N0M0, IIIA	None	Neg	Pos	Pos	Pos	Neg	Pos	Pos	Pos	Pos	Pos	Pos	Pos	Neg
P21	B3	I	T1N0M0, I	None	NA
P22	B3	I	T1N0M0, I	Myasthenia Gravis	NA	NA	NA	Pos	NA	Pos	Pos	Pos	Pos	NA	NA	NA	NA	Ki-67 (index10%)
P23	B3	I	T1N0M0, I	None	Neg	Neg	Pos	Focal+	Focal+	Pos	Focal+	Focal+	Focal+	Scattered+	NA	Pos	Neg	LCA (scattered+), PGP9.5 (-), CD117 (scattered+), CD56 (NK-1) (scattered+), CgA (-), Ki-67 (index10%), Syn (-)
P24	B3	II	T2N0M0, II	None	Pos	Neg	Pos	Pos	Pos	Pos	Pos	Pos	Focal+	Scattered+	Pos	Pos	Neg
P25	TC (squamous cell carcinoma)	III	T3N0M0, IIIA	None	NA	NA	Pos	NA	NA	NA	NA	Pos	NA	NA	NA	NA	NA	ALK-D5F3 (-), CK20 (-), CK7 (-), NapsinA (-), P40 (+), TTF-1 (-), CD117 (+)
P26	TC (squamous cell carcinoma)	III	T4N0M0, IIIB	None	NA	NA	NA	NA	NA	NA	NA	Pos	NA	NA	NA	NA	NA	CD117 (+)
P27	TC (squamous cell carcinoma)	III	T3N0M0, IIIA	None	Neg	NA	Neg	NA	NA	NA	NA	Pos	NA	NA	NA	NA	NA	CK7 (+), NapsinA (-), TTF-1 (-), ALK-D5F3 (-), CK20 (-), P40 (-), CD117 (+), CgA (-), Syn (-)
